# Supplementary material
Source: HighWire-hosted journal article supplement (https://gut.bmj.com/content/71/1/16)
Supplement: inline-supplementary-material-1 [file inline-supplementary-material-1.pdf]

## Table of Contents

|                                                                                                                                                                                                                                                  |    |
|--------------------------------------------------------------------------------------------------------------------------------------------------------------------------------------------------------------------------------------------------|----|
| Supplementary Table 1. List of British National Formulary Codes for Proton Pump Inhibitors .....                                                                                                                                                 | 2  |
| Supplementary Table 2. List of British National Formulary Codes for Histamine-2 Receptor Antagonists.....                                                                                                                                        | 3  |
| Supplementary Table 3. Gastric Cancer Read Codes Used to Define Events.....                                                                                                                                                                      | 4  |
| Supplementary Table 4. Defined Daily Dose of Proton Pump Inhibitors .....                                                                                                                                                                        | 5  |
| Supplementary Table 5. Crude and Adjusted HRs for the Association Between the Use of Specific Types of Proton Pump Inhibitors and Gastric Cancer Compared to the Use of Histamine-2 Receptor Antagonists .....                                   | 6  |
| Supplementary Table 6. Adjusted HRs for the Association Between the Use of Proton Pump Inhibitors and Gastric Cancer Compared to the Use of Histamine-2 Receptor Antagonists (Interaction with Age).....                                         | 7  |
| Supplementary Table 7. Adjusted HRs for the Association Between the Use of Proton Pump Inhibitors and Gastric Cancer Compared to the Use of Histamine-2 Receptor Antagonists (Interaction with Sex).....                                         | 8  |
| Supplementary Table 8. Adjusted HRs for the Association Between the Use of Proton Pump Inhibitors and Gastric Cancer Compared to the Use of Histamine-2 Receptor Antagonists Stratified by Approved Indication at Baseline .....                 | 9  |
| Supplementary Table 9. Adjusted HRs for the Association Between the Use of Proton Pump Inhibitors and Gastric Cancer Compared to the Use of Histamine-2 Receptor Antagonists Stratified by Category of Calendar Year .....                       | 10 |
| Supplementary Table 10. Crude and Adjusted HRs for the Association Between the Use of Proton Pump Inhibitors and Gastric Cancer Compared to the Use of Histamine-2 Receptor Antagonists (Different Lag Periods).....                             | 11 |
| Supplementary Table 11. Crude and Adjusted HRs for the Association Between the Use of Proton Pump Inhibitors and Gastric Cancer Compared to the Use of Histamine-2 Receptor Antagonists (Intention-to-treat Exposure Definition) * .....         | 12 |
| Supplementary Table 12. Crude and Adjusted HRs for the Association Between the Use of Proton Pump Inhibitors and Gastric Cancer Compared to the Use of Histamine-2 Receptor Antagonists (Adjustment for IPCW).....                               | 13 |
| Supplementary Table 13. Crude and Adjusted HRs for the Association Between the Use of Proton Pump Inhibitors and Gastric Cancer Compared to the Use of Histamine-2 Receptor Antagonists (Truncate Follow-up for Possible NDMA Contaminant)*..... | 14 |
| Supplementary Table 14. Crude and Adjusted HRs for the Association Between the Use of Proton Pump Inhibitors and Gastric Cancer Compared to the Use of Histamine-2 Receptor Antagonists (HD-PS)* .....                                           | 15 |
| Supplementary Table 15. Sensitivity Analysis Without Assumptions for Unmeasured Confounding.....                                                                                                                                                 | 16 |
| Supplementary Method 1. Inverse Probability of Censoring Weights.....                                                                                                                                                                            | 17 |
| Supplementary Method 2. High-dimensional propensity-scores .....                                                                                                                                                                                 | 18 |
| Supplementary Method 3. Sensitivity analysis without assumptions .....                                                                                                                                                                           | 19 |
| Supplementary Figure 1. Cohort Construction.....                                                                                                                                                                                                 | 20 |
| Supplementary Figure 2. Restricted Cubic Spline of Cumulative Duration of Proton Pump Inhibitor Use.....                                                                                                                                         | 21 |
| Supplementary Figure 3. Restricted Cubic Spline of Cumulative Dose of Proton Pump Inhibitor Use.....                                                                                                                                             | 22 |
| References .....                                                                                                                                                                                                                                 | 23 |

---

**Supplementary Table 1. List of British National Formulary Codes for Proton Pump Inhibitors**

---

| <b>British National Formulary Code</b> | <b>British National Formulary Header</b>                     |
|----------------------------------------|--------------------------------------------------------------|
| 01030500/05010103                      | Proton Pump Inhibitors/Broad-spectrum Penicillins            |
| 01030500/10010100                      | Proton Pump Inhibitors/Non-steroidal Anti-inflammatory Drugs |
| 01030500/05010500                      | Proton Pump Inhibitors/Macrolides                            |
| 1030500                                | Proton Pump Inhibitors                                       |

---

---

**Supplementary Table 2. List of British National Formulary Codes for Histamine-2 Receptor Antagonists**

---

| <b>British National Formulary Code</b> | <b>British National Formulary Header</b>               |
|----------------------------------------|--------------------------------------------------------|
| 1030100                                | H2 receptor antagonists                                |
| 01030100/01010201                      | H2 receptor antagonists/Alginate preparations          |
| 01030300/01030100                      | Chelates and complexes/H2 receptor antagonists         |
| 01030300/01030100                      | Chelates and complexes/H2 receptor antagonists         |
| 01030100/01010202                      | H2 receptor antagonists/Indigestion remedies           |
| 01010201/01030100                      | Compound Alginate Preparations/H2-Receptor Antagonists |
| 01010202/01030100                      | Indigestion Preparations/H2-Receptor Antagonists       |

---

Abbreviations: H2, Histamine-2.

**Supplementary Table 3. Gastric Cancer Read Codes Used to Define Events**

| <b>Read Code</b> | <b>Read Term</b>                                             |
|------------------|--------------------------------------------------------------|
| B11y100          | Malignant neoplasm of posterior wall of stomach NEC          |
| B11y000          | Malignant neoplasm of anterior wall of stomach NEC           |
| B110000          | Malignant neoplasm of cardiac orifice of stomach             |
| B11..11          | Gastric neoplasm                                             |
| B110100          | Malignant neoplasm of cardio-oesophageal junction of stomach |
| B110111          | Malignant neoplasm of gastro-oesophageal junction            |
| B113.00          | Malignant neoplasm of fundus of stomach                      |
| B111.00          | Malignant neoplasm of pylorus of stomach                     |
| B117.00          | Malignant neoplasm, overlapping lesion of stomach            |
| B11..00          | Malignant neoplasm of stomach                                |
| B11yz00          | Malignant neoplasm of other specified site of stomach NOS    |
| B11y.00          | Malignant neoplasm of other specified site of stomach        |
| B11z.00          | Malignant neoplasm of stomach NOS                            |
| B115.00          | Malignant neoplasm of lesser curve of stomach unspecified    |
| B116.00          | Malignant neoplasm of greater curve of stomach unspecified   |
| B114.00          | Malignant neoplasm of body of stomach                        |
| B111000          | Malignant neoplasm of prepylorus of stomach                  |
| B112.00          | Malignant neoplasm of pyloric antrum of stomach              |
| B110.00          | Malignant neoplasm of cardia of stomach                      |
| B111100          | Malignant neoplasm of pyloric canal of stomach               |
| B111z00          | Malignant neoplasm of pylorus of stomach NOS                 |
| B110z00          | Malignant neoplasm of cardia of stomach NOS                  |

Abbreviations: NEC, Neuroendocrine carcinoma; NOS, not otherwise specified.

---

**Supplementary Table 4. Defined Daily Dose of Proton Pump Inhibitors**

---

| <b>Proton Pump Inhibitor Type</b> | <b>Defined Daily Dose*</b> |
|-----------------------------------|----------------------------|
| Omeprazole                        | 20 mg                      |
| Esomeprazole                      | 30 mg                      |
| Rabeprazole                       | 20 mg                      |
| Lansoprazole                      | 30 mg                      |
| Pantoprazole                      | 40 mg                      |

---

\*All doses are equivalent to 1 Defined Daily Dose.

The dose of each PPI prescription was defined according to the World Health Organization defined daily dose and converted into omeprazole equivalents.<sup>1</sup> This allows for PPIs with different potencies to be compared. According to the defined daily dose, a patient prescribed a 30-day course of 30-mg of esomeprazole is equivalent to a patient prescribed a 30-day course of 20-mg omeprazole.

**Supplementary Table 5. Crude and Adjusted HRs for the Association Between the Use of Specific Types of Proton Pump Inhibitors and Gastric Cancer Compared to the Use of Histamine-2 Receptor Antagonists**

| Exposure                         | Events | Person-years | Crude incidence rate (95% CI) * | Crude HR | Calendar-year weighted HR | Marginal HR (95% CI) † |
|----------------------------------|--------|--------------|---------------------------------|----------|---------------------------|------------------------|
| Histamine-2 receptor antagonists | 244    | 947,418      | 25.8 (22.6 to 29.2)             | 1.00     | 1.00 [Reference]          | 1.00 [Reference]       |
| Proton pump inhibitor type ‡     |        |              |                                 |          |                           |                        |
| Esomeprazole                     | 17     | 78,412       | 21.7 (12.6 to 34.7)             | 0.86     | 1.15 (0.70 to 1.89)       | 1.25 (0.72 to 2.16)    |
| Lansoprazole                     | 426    | 1,685,920    | 25.3 (22.9 to 27.8)             | 0.98     | 1.37 (1.15 to 1.63)       | 1.48 (1.10 to 2.01)    |
| Omeprazole                       | 661    | 2,867,210    | 23.1 (21.3 to 24.9)             | 0.88     | 1.34 (1.13 to 1.58)       | 1.45 (1.03 to 2.02)    |
| Pantoprazole                     | 22     | 102,816      | 21.4 (13.4 to 32.4)             | 0.86     | 1.10 (0.71 to 1.71)       | 1.19 (0.73 to 1.95)    |
| Rabeprazole                      | 40     | 150,378      | 26.6 (19.0 to 36.2)             | 1.07     | 1.34 (0.95 to 1.89)       | 1.44 (0.96 to 2.15)    |

Abbreviations: HR, hazard ratio; CI, confidence interval.

\* Per 100,000 person-years.

† Weighted using standardized mortality ratio weights.

‡ Combination users contributed 0 events and 3,035 person-years of follow-up.

**Supplementary Table 6. Adjusted HRs for the Association Between the Use of Proton Pump Inhibitors and Gastric Cancer Compared to the Use of Histamine-2 Receptor Antagonists (Interaction with Age)**

|                                  | Age < 65            | Age 65-74           | Age ≥ 75            |
|----------------------------------|---------------------|---------------------|---------------------|
| Events                           | 431                 | 491                 | 488                 |
| Person-Years                     | 3,907,039           | 1,191,102           | 737,049             |
| Crude incidence rate (95% CI) *  | 11.0 (10.0 to 12.1) | 41.2 (37.7 to 45.0) | 66.2 (60.5 to 72.4) |
| Crude HR                         |                     |                     |                     |
| Histamine-2 receptor antagonists | 1.00                | 1.00                | 1.00                |
| Proton pump inhibitors           | 0.77                | 1.02                | 1.00                |
|                                  |                     |                     | p-interaction: 0.18 |
| Adjusted HR (95% CI) †           |                     |                     |                     |
| Histamine-2 receptor antagonists | 1.00 [Reference]    | 1.00 [Reference]    | 1.00 [Reference]    |
| Proton pump inhibitors           | 1.27 (0.69 to 2.33) | 1.42 (0.84 to 2.40) | 1.71 (1.04 to 2.81) |
|                                  |                     |                     | p-interaction: 0.75 |

Abbreviations: HR, hazard ratio; CI, confidence interval.

\* Per 100,000 person-years.

†Weighted using standardized mortality ratio weights.

**Supplementary Table 7. Adjusted HRs for the Association Between the Use of Proton Pump Inhibitors and Gastric Cancer Compared to the Use of Histamine-2 Receptor Antagonists (Interaction with Sex)**

|                                  | Male                | Female              |
|----------------------------------|---------------------|---------------------|
| Events                           | 854                 | 556                 |
| Person-Years                     | 2,591,410           | 3,243,779           |
| Crude Incidence Rate (95% CI)*   | 33.0 (30.8 to 35.2) | 17.1 (15.7 to 18.6) |
| Crude HR                         |                     |                     |
| Histamine-2 receptor antagonists | 1.00                | 1.00                |
| Proton pump inhibitors           | 0.87                | 0.98                |
|                                  |                     | p-interaction: 0.43 |
| Adjusted HR (95% CI) †           |                     |                     |
| Histamine-2 receptor antagonists | 1.00 [Reference]    | 1.00 [Reference]    |
| Proton pump inhibitors           | 1.25 (0.84 to 1.88) | 1.91 (1.22 to 3.00) |
|                                  |                     | p-interaction: 0.17 |

Abbreviations: HR, hazard ratio; CI, confidence interval.

\* Per 100,000 person-years.

† Weighted using standardized mortality ratio weights.



**Supplementary Table 8. Adjusted HRs for the Association Between the Use of Proton Pump Inhibitors and Gastric Cancer Compared to the Use of Histamine-2 Receptor Antagonists Stratified by Approved Indication at Baseline**

| Indication *                     | Events | Person-years | Crude incidence rate (95% CI) † | Crude HR | Calendar-year weighted HR | Marginal HR (95% CI) † |
|----------------------------------|--------|--------------|---------------------------------|----------|---------------------------|------------------------|
| Gastroesophageal reflux disease  |        |              |                                 |          |                           |                        |
| Histamine-2 receptor antagonists | 20     | 78,410       | 25.5 (15.6 to 39.4)             | 1.00     | 1.00 [Reference]          | 1.00 [Reference]       |
| Proton pump inhibitor            | 106    | 484,578      | 21.9 (17.9 to 26.5)             | 0.86     | 1.23 (0.71 to 2.13)       | 1.38 (0.59 to 3.22)    |
| Peptic ulcer disease             |        |              |                                 |          |                           |                        |
| Histamine-2 receptor antagonists | 21     | 40,570       | 51.8 (32.0 to 79.1)             | 1.00     | 1.00 [Reference]          | 1.00 [Reference]       |
| Proton pump inhibitor            | 90     | 161,650      | 55.7 (44.8 to 68.4)             | 1.06     | 1.38 (0.77 to 2.48)       | 1.53 (0.48 to 4.92)    |
| Dyspepsia                        |        |              |                                 |          |                           |                        |
| Histamine-2 receptor antagonists | 97     | 292,664      | 33.1 (26.9 to 40.4)             | 1.00     | 1.00 [Reference]          | 1.00 [Reference]       |
| Proton pump inhibitor            | 270    | 954,590      | 28.3 (25.0 to 31.9)             | 0.86     | 1.19 (0.90 to 1.56)       | 1.12 (0.69 to 1.85)    |

Abbreviations: HR, hazard ratio; CI, confidence interval.

\* Barrett's esophagus and *H. pylori* generated few events with unstable estimates.

† Per 100,000 person-years.

‡ Weighted using standardized mortality ratio weights.

**Supplementary Table 9. Adjusted HRs for the Association Between the Use of Proton Pump Inhibitors and Gastric Cancer Compared to the Use of Histamine-2 Receptor Antagonists Stratified by Category of Calendar Year**

| Calendar Year                    | Events | Person-years | Crude incidence rate (95% CI) * | Crude HR | Marginal HR (95% CI) † |
|----------------------------------|--------|--------------|---------------------------------|----------|------------------------|
| 1990-1994                        |        |              |                                 |          |                        |
| Histamine-2 receptor antagonists | 88     | 221,998      | 39.6 (31.8 to 48.8)             | 1.00     | 1.00 [Reference]       |
| Proton pump inhibitor            | 21     | 61,313       | 34.3 (21.2 to 52.4)             | 0.89     | 0.95 (0.58 to 1.56)    |
| 1995-1999                        |        |              |                                 |          |                        |
| Histamine-2 receptor antagonists | 83     | 282,105      | 29.4 (23.4 to 36.5)             | 1.00     | 1.00 [Reference]       |
| Proton pump inhibitor            | 89     | 305,308      | 29.2 (23.4 to 35.9)             | 1.06     | 1.07 (0.78 to 1.46)    |
| 2000-2004                        |        |              |                                 |          |                        |
| Histamine-2 receptor antagonists | 54     | 280,498      | 19.3 (14.5 to 25.1)             | 1.00     | 1.00 [Reference]       |
| Proton pump inhibitor            | 315    | 1,143,684    | 27.5 (24.6 to 30.8)             | 1.57     | 1.43 (1.04 to 1.98)    |
| 2005-2009                        |        |              |                                 |          |                        |
| Histamine-2 receptor antagonists | 9      | 114,596      | 7.9 (3.6 to 14.9)               | 1.00     | 1.00 [Reference]       |
| Proton pump inhibitor            | 515    | 1,999,341    | 25.8 (23.6 to 28.0)             | 3.43     | 2.55 (1.21 to 5.38)    |
| 2010-2018                        |        |              |                                 |          |                        |
| Histamine-2 receptor antagonists | 10     | 48,221       | 20.7 (9.9 to 38.1)              | 1.00     | 1.00 [Reference]       |
| Proton pump inhibitor            | 226    | 1,378,125    | 16.4 (14.3 to 18.7)             | 0.82     | 0.87 (0.45 to 1.71)    |

Abbreviations: HR, hazard ratio; CI, confidence interval.

\* Per 100,000 person-years.

† Weighted using standardized mortality ratio weights.

**Supplementary Table 10. Crude and Adjusted HRs for the Association Between the Use of Proton Pump Inhibitors and Gastric Cancer Compared to the Use of Histamine-2 Receptor Antagonists (Different Lag Periods)**

| Length of Lag Period             | Events | Person-years | Crude incidence rate (95% CI) * | Crude HR | Calendar-year weighted HR | Marginal HR (95% CI) † |
|----------------------------------|--------|--------------|---------------------------------|----------|---------------------------|------------------------|
| 3 years                          |        |              |                                 |          |                           |                        |
| Histamine-2 receptor antagonists | 136    | 649,219      | 20.9 (17.6 to 24.8)             | 1.00     | 1.00 [Reference]          | 1.00 [Reference]       |
| Proton pump inhibitors           | 671    | 3,235,785    | 20.7 (19.2 to 22.4)             | 0.99     | 1.28 (1.05 to 1.56)       | 1.75 (1.06 to 2.89)    |
| 5 years                          |        |              |                                 |          |                           |                        |
| Histamine-2 receptor antagonists | 102    | 441,939      | 23.1 (18.8 to 28.0)             | 1.00     | 1.00                      | 1.00 [Reference]       |
| Proton pump inhibitors           | 435    | 2,047,297    | 21.2 (19.3 to 23.3)             | 0.91     | 1.21 (0.96 to 1.52)       | 1.41 (0.66 to 3.00)    |
| 10 years                         |        |              |                                 |          |                           |                        |
| Histamine-2 receptor antagonists | 36     | 36,462       | 24.4 (17.1 to 33.8)             | 1.00     | 1.00 [Reference]          | 1.00 [Reference]       |
| Proton pump inhibitors           | 95     | 490,853      | 19.4 (15.7 to 23.7)             | 0.78     | 1.00 (0.67 to 1.49)       | 2.21(0.94 to 5.19)     |

Abbreviations: HR, hazard ratio; CI, confidence interval.

\* Per 100,000 person-years.

† Weighted using standardized mortality ratio weights.

**Supplementary Table 11. Crude and Adjusted HRs for the Association Between the Use of Proton Pump Inhibitors and Gastric Cancer Compared to the Use of Histamine-2 Receptor Antagonists (Intention-to-treat Exposure Definition) \***

| Exposure                         | Events | Person-years | Crude incidence rate (95% CI) † | Crude HR | Calendar-year weighted HR | Marginal HR (95% CI) ‡ |
|----------------------------------|--------|--------------|---------------------------------|----------|---------------------------|------------------------|
| Histamine-2 receptor antagonists | 493    | 1,760,954    | 28.0 (25.6 to 30.6)             | 1.00     | 1.00 [Reference]          | 1.00 [Reference]       |
| Proton pump inhibitors           | 1,256  | 5,275,112    | 23.8 (22.5 to 25.2)             | 0.82     | 1.12 (0.99 to 1.26)       | 1.26 (1.02 to 1.55)    |

Abbreviations: HR, hazard ratio; CI, confidence interval.

\* Did not censor on switch from PPI to H2RA or H2RA to PPI.

† Per 100,000 person-years.

‡ Weighted using standardized mortality ratio weights.

**Supplementary Table 12. Crude and Adjusted HRs for the Association Between the Use of Proton Pump Inhibitors and Gastric Cancer Compared to the Use of Histamine-2 Receptor Antagonists (Adjustment for IPCW)**

| Exposure                         | Events | Person-years | Crude incidence rate (95% CI) * | Crude HR | Calendar-year weighted HR | Marginal HR (95% CI) † |
|----------------------------------|--------|--------------|---------------------------------|----------|---------------------------|------------------------|
| Histamine-2 receptor antagonists | 244    | 1,253,913    | 19.5 (17.1 to 22.1)             | 1.00     | 1.00 [Reference]          | 1.00 [Reference]       |
| Proton pump inhibitors           | 1,166  | 6,360,764    | 18.3 (17.3 to 19.4)             | 0.93     | 1.41 (1.20 to 1.66)       | 1.54 (1.01 to 2.35)    |

Abbreviations: HR, hazard ratio; CI, confidence interval.

\* Per 100,000 person-years.

† Weighted using standardized mortality ratio weights and inverse probability of censoring weights for death and switching.

**Supplementary Table 13. Crude and Adjusted HRs for the Association Between the Use of Proton Pump Inhibitors and Gastric Cancer Compared to the Use of Histamine-2 Receptor Antagonists (Truncate Follow-up for Possible NDMA Contaminant)\***

| Exposure                         | Events | Person-years | Crude incidence rate (95% CI) † | Crude HR | Calendar-year weighted HR | Marginal HR (95% CI) ‡ |
|----------------------------------|--------|--------------|---------------------------------|----------|---------------------------|------------------------|
| Histamine-2 receptor antagonists | 243    | 932,052      | 26.1 (22.9 to 29.6)             | 1.00     | 1.00 [Reference]          | 1.00 [Reference]       |
| Proton pump inhibitors           | 1,113  | 4,497,921    | 24.7 (23.3 to 26.2)             | 0.94     | 1.33 (1.14 to 1.56)       | 1.41 (1.02 to 1.94)    |

Abbreviations: HR, hazard ratio; CI, confidence interval.

\* Follow-up truncated on December 31, 2017.

† Per 100,000 person-years.

‡ Weighted using standardized mortality ratio weights.

**Supplementary Table 14. Crude and Adjusted HRs for the Association Between the Use of Proton Pump Inhibitors and Gastric Cancer Compared to the Use of Histamine-2 Receptor Antagonists (HD-PS)\***

| Exposure                         | Events | Person-years | Crude incidence rate (95% CI) † | Crude HR | Marginal HR (95% CI) ‡ |
|----------------------------------|--------|--------------|---------------------------------|----------|------------------------|
| Histamine-2 receptor antagonists | 244    | 947,396      | 25.8 (22.6 to 29.2)             | 1.00     | 1.00 [Reference]       |
| Proton pump inhibitors           | 1,166  | 4,887,522    | 23.9 (22.5 to 25.3)             | 0.92     | 1.48 (1.09 to 2.01)    |

Abbreviations: HR, hazard ratio; CI, confidence interval.

\* Treatment weights created using predefined covariates listed in the manuscript and 200 empirically selected covariates from the HD-PS algorithm.

† Per 100,000 person-years.

‡ Weighted using standardized mortality ratio weights.

| <b>Supplementary Table 15. Sensitivity Analysis Without Assumptions for Unmeasured Confounding</b> |                                                                     |                  |                  |                  |                  |                  |                  |                  |                  |                  |
|----------------------------------------------------------------------------------------------------|---------------------------------------------------------------------|------------------|------------------|------------------|------------------|------------------|------------------|------------------|------------------|------------------|
| <b>Risk ratio for unmeasured confounder and exposure association</b>                               | <b>Risk ratio for unmeasured confounder and outcome association</b> |                  |                  |                  |                  |                  |                  |                  |                  |                  |
|                                                                                                    | <b>1.2</b>                                                          | <b>1.3</b>       | <b>1.5</b>       | <b>1.8</b>       | <b>2.0</b>       | <b>2.5</b>       | <b>3.0</b>       | <b>4.0</b>       | <b>5.0</b>       |                  |
|                                                                                                    | <b>1.2</b>                                                          | 1.41 (1.03-1.93) | 1.39 (1.02-1.90) | 1.37 (1.00-1.87) | 1.34 (0.98-1.83) | 1.33 (0.97-1.82) | 1.31 (0.95-1.78) | 1.29 (0.94-1.76) | 1.27 (0.93-1.73) | 1.26 (0.92-1.72) |
|                                                                                                    | <b>1.3</b>                                                          | 1.39 (1.02-1.9)  | 1.37 (1.00-1.87) | 1.34 (0.98-1.83) | 1.3 (0.95-1.78)  | 1.28 (0.94-1.75) | 1.25 (0.91-1.71) | 1.23 (0.9-1.68)  | 1.20 (0.88-1.64) | 1.18 (0.86-1.61) |
|                                                                                                    | <b>1.5</b>                                                          | 1.37 (1.00-1.87) | 1.34 (0.98-1.83) | 1.29 (0.94-1.76) | 1.24 (0.90-1.69) | 1.21 (0.88-1.65) | 1.16 (0.85-1.58) | 1.13 (0.82-1.54) | 1.09 (0.80-1.49) | 1.06 (0.78-1.45) |
|                                                                                                    | <b>1.8</b>                                                          | 1.34 (0.98-1.83) | 1.3 (0.95-1.78)  | 1.24 (0.90-1.69) | 1.16 (0.85-1.59) | 1.13 (0.82-1.54) | 1.06 (0.78-1.45) | 1.02 (0.75-1.39) | 0.97 (0.71-1.32) | 0.93 (0.68-1.28) |
|                                                                                                    | <b>2.0</b>                                                          | 1.33 (0.97-1.82) | 1.28 (0.94-1.75) | 1.21 (0.88-1.65) | 1.13 (0.82-1.54) | 1.09 (0.80-1.49) | 1.02 (0.74-1.39) | 0.97 (0.71-1.32) | 0.91 (0.66-1.24) | 0.87 (0.64-1.19) |
|                                                                                                    | <b>2.5</b>                                                          | 1.31 (0.95-1.78) | 1.25 (0.91-1.71) | 1.16 (0.85-1.58) | 1.06 (0.78-1.45) | 1.02 (0.74-1.39) | 0.93 (0.68-1.27) | 0.87 (0.64-1.19) | 0.80 (0.58-1.09) | 0.75 (0.55-1.03) |
|                                                                                                    | <b>3.0</b>                                                          | 1.29 (0.94-1.76) | 1.23 (0.90-1.68) | 1.13 (0.82-1.54) | 1.02 (0.75-1.39) | 0.97 (0.71-1.32) | 0.87 (0.64-1.19) | 0.81 (0.59-1.1)  | 0.73 (0.53-0.99) | 0.68 (0.49-0.92) |
|                                                                                                    | <b>4.0</b>                                                          | 1.27 (0.93-1.73) | 1.20 (0.88-1.64) | 1.09 (0.80-1.49) | 0.97 (0.71-1.32) | 0.91 (0.66-1.24) | 0.8 (0.58-1.09)  | 0.73 (0.53-0.99) | 0.63 (0.46-0.87) | 0.58 (0.42-0.79) |
| <b>5.0</b>                                                                                         | 1.26 (0.92-1.72)                                                    | 1.18 (0.86-1.61) | 1.06 (0.78-1.45) | 0.93 (0.68-1.28) | 0.87 (0.64-1.19) | 0.75 (0.55-1.03) | 0.68 (0.49-0.92) | 0.58 (0.42-0.79) | 0.52 (0.38-0.71) |                  |



### Supplementary Method 1. Inverse Probability of Censoring Weights

We used inverse probability of censoring weighting to assess the potential impact of differential censoring from drug switching (i.e. PPI users adding-on/switching to H2RAs, and vice versa) (1, 2), and to investigate death as a competing risk between PPI and H2RA users (3). This analysis was completed in three steps.

#### Step 1:

For both exposure groups, the follow-up period will be subdivided into one-year intervals. Inverse probability of censoring weights (IPCWs) were fit using logistic regression to predict the probability of remaining uncensored (i.e. not switching or adding on from PPI to H2RA and vice versa) at a given interval, conditional on the following variables, all measured in the previous interval: age, sex, alcohol related disorders (alcohol dependency, alcoholic cirrhosis of the liver, alcoholic hepatitis, hepatic failure), smoking status (current, former, never, unknown), body mass index, atrial fibrillation, anemia, cancer (excluding non-melanoma skin cancer), congestive heart failure, gastric metaplasia, hypercholesterolemia, hypertension, venous thromboembolism, chronic kidney disease, stroke, hernia, gastrointestinal bleeding, dialysis, gastric surgery, indications for acid suppressant drug use (approved indications: Barrett's esophagus, *Helicobacter pylori* infection, gastro-oesophageal reflux disease, peptic ulcer disease, dyspepsia; off-label indications: gastritis/duodenitis and stomach pain) and use of the following medications: metformin, non-steroidal anti-inflammatory drugs, antiplatelets, dual antiplatelets, cyclooxygenase-2 inhibitors, synthetic prostaglandin analogs, selective serotonin reuptake inhibitors, anticoagulants and steroids.

**Step 2:** We repeated step 1 by fitting a logistic regression model for remaining alive at a given interval (i.e. not having death as a competing event), using the same covariates as above.

**Step 3:** Using the fitted logistic models generated in Steps 1 and 2, we took the product of the weights (i.e. inverse of the probability of being uncensored from drug switching and from not dying) across all intervals for a given patient. We then stabilized the weight for each patient using intercept only models as the numerator. Unstable weights were truncated at the 0.5<sup>th</sup> and 99.5<sup>th</sup> percentile. For each patient, the stabilized IPCWs generated in steps 1 and 2 were multiplied along with the standardized mortality ratio weights used in the primary model to generate an overall weight. Thus, stabilized IPCWs and treatment weights were used to estimate the marginal hazard ratio of gastric cancer associated with the use of PPIs compared with H2RAs.

## Supplementary Method 2. High-dimensional propensity-scores

We used the high-dimensional propensity score (HD-PS) approach to reweigh our study population to investigate the impact of residual confounding. The HD-PS is a seven-step algorithm which empirically selects covariates from different data dimensions based on their prevalence and potential for confounding (4). The HD-PS represents an efficient means to control for confounding as adjustment is based on this summary score and not individual covariate values. The HD-PS model may also account for some unmeasured confounding, as the empirically selected variables may include proxies for unmeasured or unknown confounders (5).

Using the HD-PS algorithm, we empirically selected 200 covariates, in addition to the prespecified covariates listed in the manuscript and calendar year of cohort entry. Covariates were selected from five data dimensions, including prescriptions, procedures, diagnoses, disease history and administrative files. Propensity scores were then estimated using logistic regression as the predicted probability of receiving a PPI versus a H2RA, conditional on the empirically selected covariates, predefined covariates listed in the manuscript and calendar year of cohort entry. Using the estimated predicted probabilities, we reweighed the cohort using standardized mortality ratio weighting.(6) Patients exposed to PPIs were given a weight of 1, and patients exposed to H2RAs were given a weight of the odds of treatment probability ( $PS/[1-PS]$ ) (6). Treatment weights were combined with IPCWs, and marginal hazard ratios for gastric cancer for users of PPIs compared to users of H2RAs were estimated.

### **Supplementary Method 3. Sensitivity analysis without assumptions**

To assess the impact of residual confounding on the observed hazard ratio, we conducted a post-hoc sensitivity analysis using the model proposed by Ding and VanderWeele (7). This model is a flexible approach to dealing with unmeasured confounding as it does not impose assumptions on the unmeasured confounder(s). Instead, the model derives a joint bounding factor and a sharp inequality. For an unmeasured confounder to explain away the observed hazard ratio, the sensitivity analysis parameters must satisfy the inequality. Thus, to nullify the observed hazard ratio observed in this study (HR: 1.45, 95% CI: 1.06 – 1.98), an unmeasured confounder would need to be strongly associated with both the exposure and the outcome (supplementary table 17). Should the strength of the association between an unmeasured confounder and the outcome have a magnitude of 3.0, this confounder would also need to be associated with the exposure to a magnitude of 2.0 to nullify the observed hazard ratio.

### Supplementary Figure 1. Cohort Construction

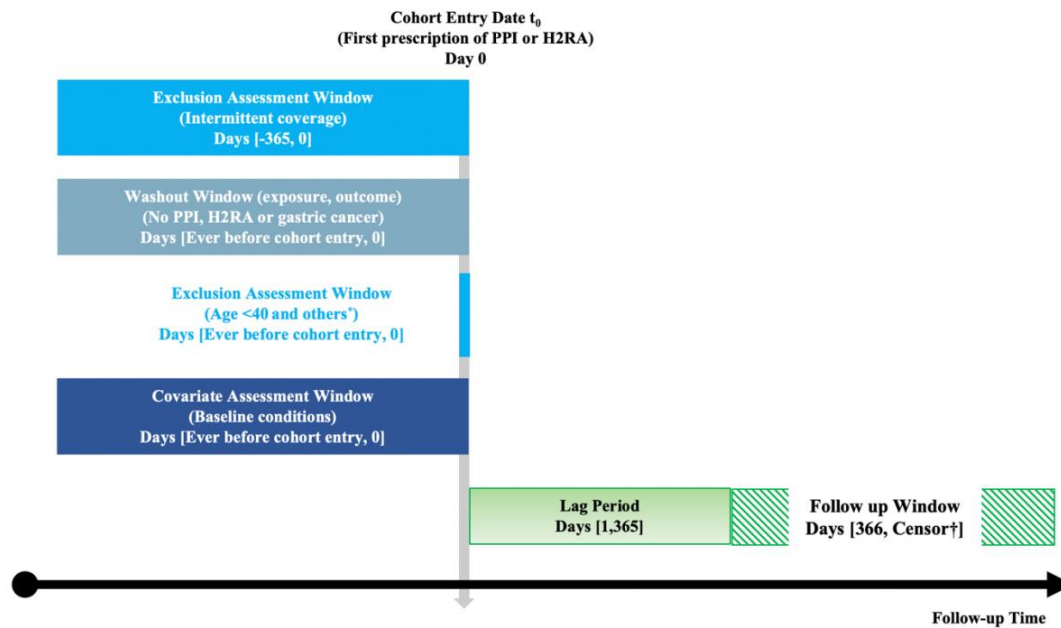

\* Concomitant PPI and H2RA use, inherited cancer syndromes, less than 1 year of follow-up.

† Earliest of an incident diagnosis of gastric cancer, death from any cause, 1 year after switch between study drugs, end of registration, last collection date, or end of the study period (April 30, 2019), whichever occurs first.

Abbreviations: PPI: proton pump inhibitor; H2RA: histamine-2 receptor antagonist.

### Supplementary Figure 2. Restricted Cubic Spline of Cumulative Duration of Proton Pump Inhibitor Use

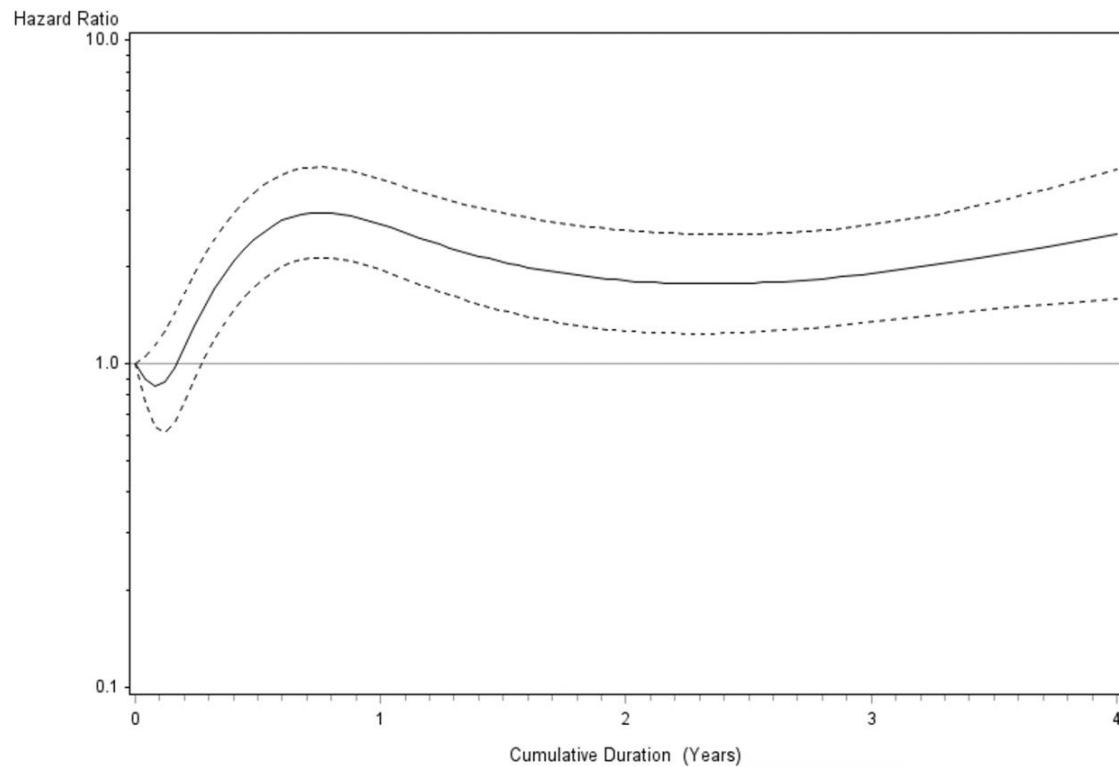

Smooth restricted cubic spline curve using 5 knots of weighted hazard ratio of gastric cancer disease (solid line) and 95% confidence limits (dashed lines) as function of cumulative duration of proton pump inhibitor use. Cumulative duration was truncated at 4 years of use because of few events.

### Supplementary Figure 3. Restricted Cubic Spline of Cumulative Dose of Proton Pump Inhibitor Use

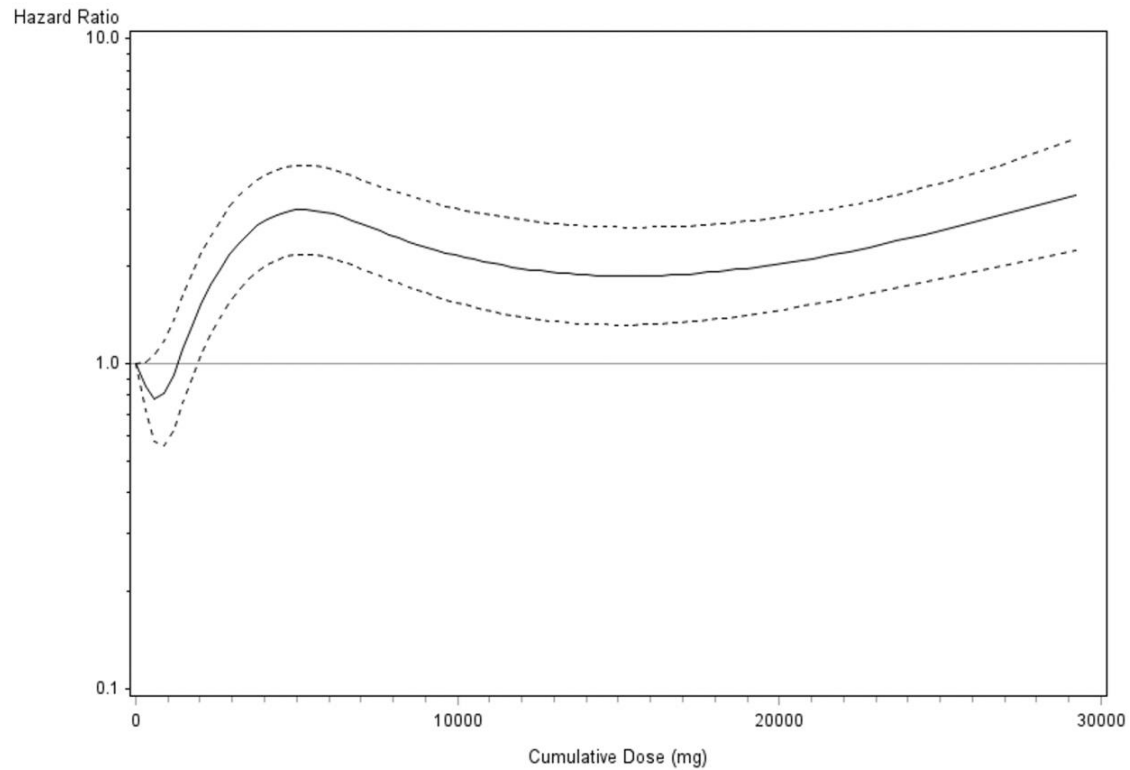

Smooth restricted cubic spline curve using 5 knots of weighted hazard ratio of gastric cancer disease (solid line) and 95% confidence limits (dashed lines) as function of cumulative dose of proton pump inhibitor use. Cumulative dose was truncated at 29,200 mg of use, which is equivalent to 4 years of daily omeprazole 20 mg, because of few events.

## References

1. Robins JM, Hernan MA, Brumback B. Marginal structural models and causal inference in epidemiology. *Epidemiology*. 2000;550-60.
2. Hernán MÁ, Brumback B, Robins JM. Marginal structural models to estimate the causal effect of zidovudine on the survival of HIV-positive men. *Epidemiology*. 2000;11(5):561-70.
3. Weuve J, Tchetgen Tchetgen EJ, Glymour MM, Beck TL, Aggarwal NT, Wilson RS, et al. Accounting for bias due to selective attrition: the example of smoking and cognitive decline. *Epidemiology*. 2012;23(1):119-28.
4. Schneeweiss S, Rassen JA, Glynn RJ, Avorn J, Mogun H, Brookhart MA. High-dimensional propensity score adjustment in studies of treatment effects using health care claims data. *Epidemiology (Cambridge, Mass.)*. 2009;20(4):512-22.
5. Guertin JR, Rahme E, LeLorier J. Performance of the high-dimensional propensity score in adjusting for unmeasured confounders. *Eur J Clin Pharmacol*. 2016;72(12):1497-505.
6. Desai RJ, Franklin JM. Alternative approaches for confounding adjustment in observational studies using weighting based on the propensity score: a primer for practitioners. *BMJ*. 2019;367:l5657.
7. Ding P, VanderWeele TJ. Sensitivity Analysis Without Assumptions. *Epidemiology*. 2016;27(3):368-77.
